# Supplementary material
Source: PubMed Central journal article supplement (PMC2934621)
Supplement: supp_M110.105767_jbc.M110.105767-1.pdf [file supp_M110.105767_jbc.M110.105767-1.pdf]

## Supplementary Information

### GRIM-19 and p16<sup>INK4a</sup> synergistically regulate cell cycle progression and E2F1-responsive gene expression

Peng Sun<sup>‡</sup>, Shreeram C. Nallar<sup>§§</sup>, Abhijit Raha<sup>§§</sup>, Sudhakar Kalakonda<sup>§§</sup>, Chidambaram N. Velalar, Sekhar P. Reddy<sup>ξ</sup>, Dhananjaya V. Kalvakolanu<sup>\*‡§§¶</sup>

\*Department of Microbiology & Immunology, <sup>‡</sup>Molecular and Cellular Cancer Biology Graduate Program, <sup>§§</sup>Greenebaum Cancer Center, University of Maryland School of Medicine, Baltimore, MD 21201. <sup>ξ</sup> Department of Environmental Health Sciences, The Johns Hopkins University Bloomberg School of Public Health, Baltimore, MD 21205

**Fig.S1: Aminoacid sequence of human INK4A. Locations of INK4-related tryptic peptides detected by MALTI-TOF analysis.**

MEPAAGSSMEPSADWLATAAARGRVEEVRALLEAGALPNAPNSYGRRP IQVMMMGSARVAELLLLLHGAEPCADP  
ATLTRPVHDAAREGFLDTLVVLHRAGARLDVRDAWGRLPVDLAEELGHRDVARYLRAAAGGTRGSNHARIDAAEG  
PSDIPD

**Fig.S2**

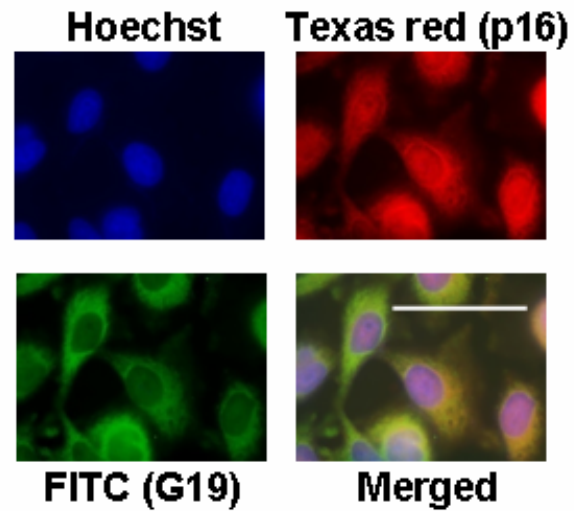

**Immunofluorescence microscopy:** Methanol-fixed HeLa cells were permeabilized and incubated with the indicated primary antibodies. For detecting GRIM-19 (Green channel) and p16 (Red channel), FITC-conjugated anti-mouse IgG and Texas red-conjugated anti-rabbit IgG were used, respectively. Hoechst was used to visualize nuclei (Blue channel). Images were captured using a fluorescence microscope (Olympus BX-FLA, Osaka) fitted with digital camera (QICAM) and processed by Q-capture pro 5.1 software (Q-Imaging corporation). Co-localization of p16 and GRIM-19 can be seen in the merged image. Scale Bar = 15  $\mu$ m

**Fig.S3**

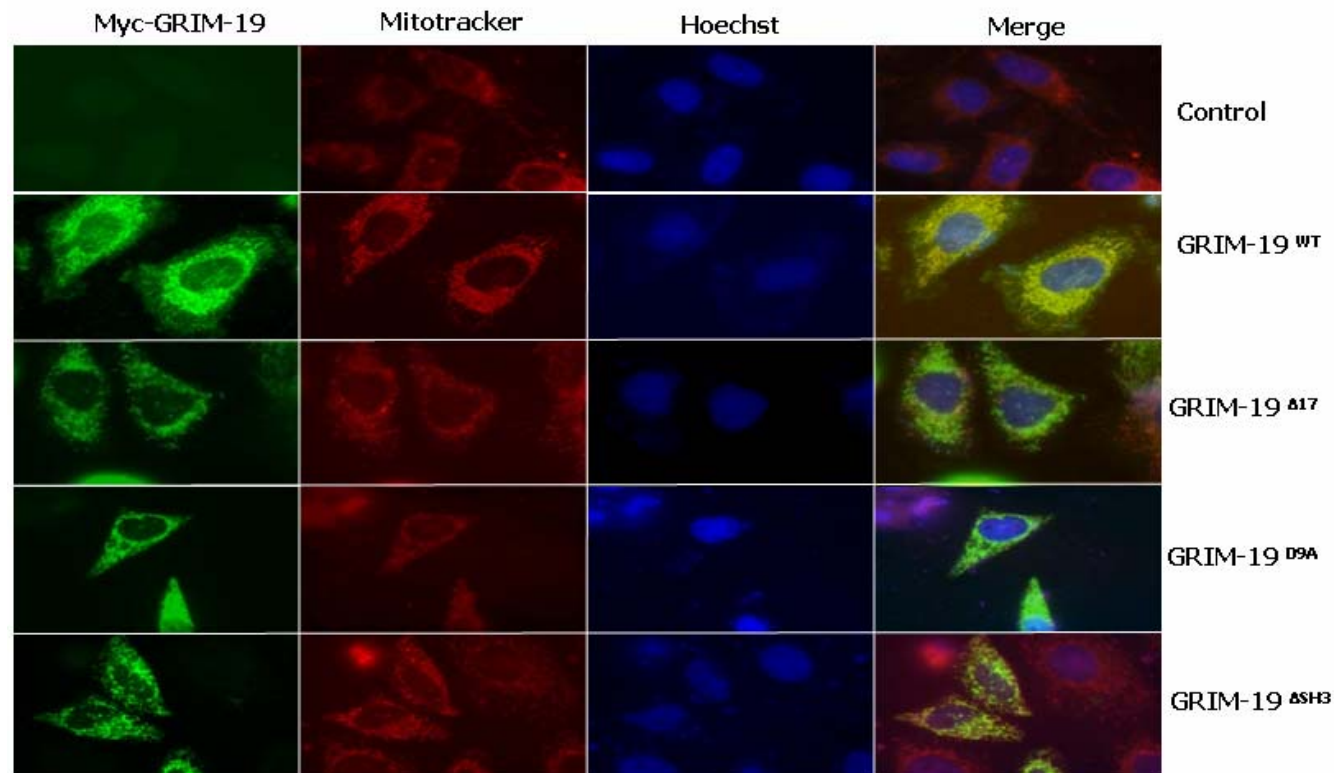

**Immunofluorescence microscopy:** Methanol-fixed cells were permeabilized and incubated with GRIM-19-specific monoclonal antibody. FITC-tagged secondary antibody was used to detect GRIM-19 (Green channel). For detecting mitochondria (Red channel), cells were incubated with Mito-tracker (Invitrogen) for 15 min followed by methanol fixation, permeabilization and incubation with the indicated antibodies. Hoechst was used to visualize nuclei (Blue channel). Images were captured using a fluorescence microscope (Olympus BX-FLA, Osaka) fitted with digital camera (QICAM) and processed by Q-capture pro 5.1 software (Q-Imaging corporation). For designations see Suppl Table 1A

Fig.S4

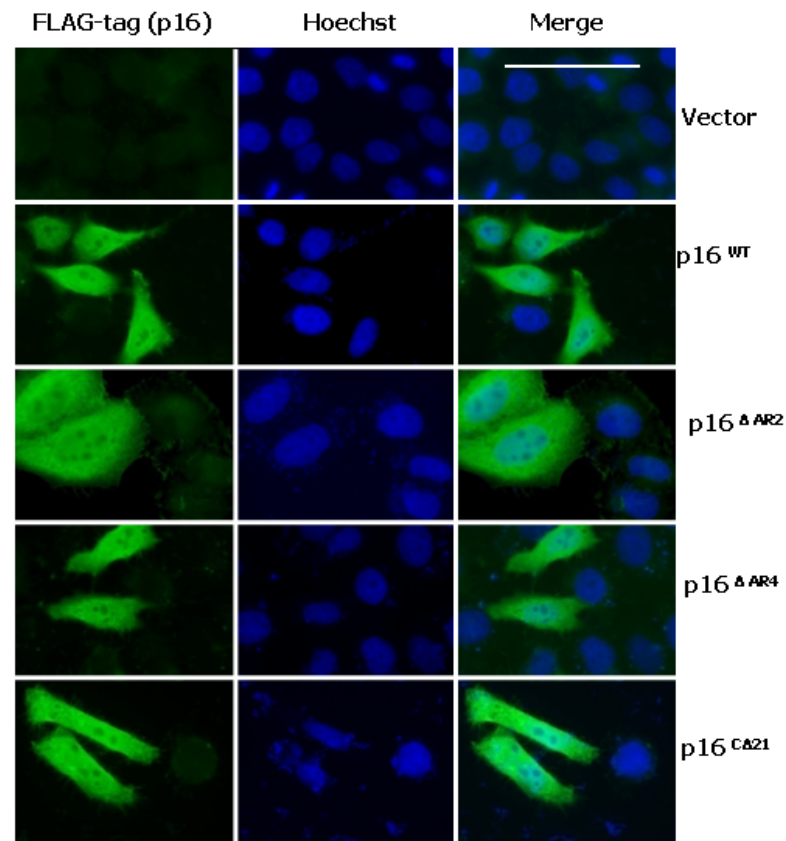

**Immunofluorescence microscopy:** Methanol-fixed cells were permeabilized and incubated with p16-specific monoclonal antibody. For detecting p16 (Green channel), FITC-conjugated anti-mouse IgG was used. Hoechst was used to visualize nuclei (Blue channel). Images were captured using a fluorescence microscope (Olympus BX-FLA, Osaka) fitted with digital camera (QICAM) and processed by Q-capture pro 5.1 software (Q-Imaging corporation). For designations see Suppl Table 1C

Fig.S5

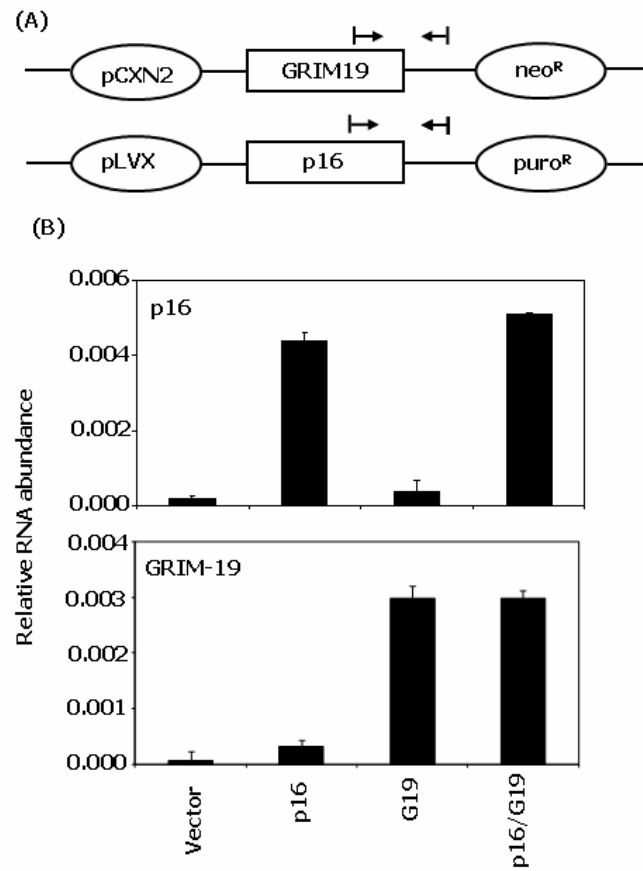

Exogenous *GRIM19* and *CDKN2A* (p16) messages transcribe equivalently in MCF-7 cell line pairs. A) Schematic representation to detect transgene-derived mRNA. B) Relative abundance of transgene-derived *CDKN2A* and *GRIM19* mRNA as measured by real-time PCR.

Fig.S6

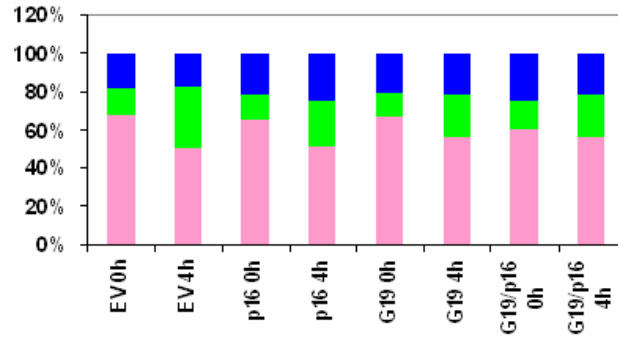

**Co-expression of GRIM-19 and p16 exert synergistic inhibitory effect on G1/S progression.**

Double thymidine-blocked MCF-7 cell line pairs were released and cell population analyzed by FACS at 0h and 4h. Cells in G1 (Pink), S (Green) and G2-M (Blue) phase are shown as shown as a stack for each cell line. Raw data obtained at 0h and 4h for each sample was used to calculate cells exiting G1 and represented as % change compared to 0h.

**Suupl Table 1A: Primers employed in PCR for generating point mutations and deletions in human *GRIM19* ORF**

| Construct ID | Sequence (5' → 3')                                    |                              |
|--------------|-------------------------------------------------------|------------------------------|
|              | Sense oligo                                           | Anti-sense oligo             |
| WT           | GCGGAATTCGCCACCATGGCGGCGTCAAAGGTG                     | CAGGGATCCCGTGTACCACATGAAGCCG |
| K5N          | GCGGAATTCGCCACCATGGCGGCGTCAAACGTGAAG                  |                              |
| Q8A          | GCGGAATTCGCCACCATGGCGGCGTCAAAGGTGAAGGCGGACATG         |                              |
| D9A          | GCGGAATTCGCCACCATGGCGGCGTCAAAGGTGAAGCAGGCGATGCC       |                              |
| M10A         | GCGGAATTCGCCACCATGGCGGCGTCAAAGGTGAAGCAGGACGCGCCTCC    |                              |
| P11A         | GCGGAATTCGCCACCATGGCGGCGTCAAAGGTGAAGCAGGACATGGCGCCGCC |                              |
| Δ1-17        | GCGGAATTCGCCACCATGCCCATCGACTACAAGCGGAAC               |                              |
| K99R*        | GCGGAATTCGCCACCATGGCGGCGTCAAAGG                       | GGGCACGTCTCGCATGATGATGGC     |
|              | GCCATCATCATGCGAGACGTGCC                               | GCGGGTACCCGTGTACCACATGAAGCCG |
| K105R*       | GCGGAATTCGCCACCATGGCGGCGTCAAAGG                       | AGACTCCCCACTCGCCAGTC         |
|              | GACTGGCGAGTGGGGGAGTCT                                 | GCGGGTACCCGTGTACCACATGAAGCCG |
| ΔHLH*        | GCGGAATTCGCCACCATGGCGGCGTCAAAGG                       | CACGGATCCCCACTTCATTATGCTCCA  |
|              | CTTGGATCCGCGCTGTTGCCACTGTTA                           | GCGGGTACCCGTGTACCACATGAAGCCG |
| ΔABD*        | GCGGAATTCGCCACCATGGCGGCGTCAAAGG                       | TCTGGATCCCTTCATGATGATGGCCTC  |
|              | TTATTGGATCCGTGCCCCCTTGATC                             | GCGGGTACCCGTGTACCACATGAAGCCG |
| ΔTPD*        | GCGGAATTCGCCACCATGGCGGCGTCAAAGG                       | TTAGGATCCAGACTCCCCACCTT      |
|              | TTATAGGATCCGAGCTGTACGGGCTG                            | GCGGGTACCCGTGTACCACATGAAGCCG |
| ΔSH3         | GCGGAATTCGCCACCATGGCGGCGTCAAAGG                       | TTATTGGTACCGATCAAGGGGGGCAC   |

Restriction enzyme sites are underlined in the primer sequence. \* cloned using overlap-extension PCR.

**Suppl Table 1B: Primers employed in PCR for generating wild-type expression constructs of murine *Cdkn2* family and human CDKN2A.**

| Construct ID  | Sequence (5' → 3')                      |                                         |
|---------------|-----------------------------------------|-----------------------------------------|
|               | Sense oligo                             | Anti-sense oligo                        |
| <i>Cdkn2a</i> | TACTGT <u>GCTAGC</u> GAGTCCGCTGCAGACAGA | CGT <u>GAATTC</u> GCTCTGCTCTTGGGATTG    |
| <i>Cdkn2c</i> | TACTGT <u>GCTAGC</u> GCCGAGCCTTGGGGGAAC | CGT <u>GAATTC</u> CCTGCAGGCTTGTGGCTCC   |
| <i>Cdkn2d</i> | TACTGT <u>GCTAGC</u> CTTCTGGAAGAAGTCTGC | CGT <u>GAATTC</u> CATTGGGATCATCATGTG    |
| <i>CDKN2A</i> | TACTGT <u>GCTAGC</u> GAGCCGGCGGGGAGC    | ATGGGAT <u>CCTCAATC</u> GGGGATGTCTGAGGG |

Restriction enzyme sites are underlined in the primer sequence.



Suppl. Table 1C: Primers employed in PCR for generating mutant *Cdkn2a/CDKN2A* constructs.

| Construct ID            | Sequence (5' → 3')                      |                                |
|-------------------------|-----------------------------------------|--------------------------------|
|                         | Sense oligo                             | Anti-sense oligo               |
| <i>Cdkn2a</i><br>ΔAR1*  | TACTGT <u>GCTAGCG</u> AGTCCGCTGCAGACAGA | CCGCCGAGCGCGCCAGTCTGTCTGC      |
|                         | CGTGCGGGCGCGCCTGGAAGCCGG                | GAAGGATCCGCTCTGCTCTTGGGATTG    |
| <i>Cdkn2a</i><br>ΔAR2*  | TACTGT <u>GCTAGCG</u> AGTCCGCTGCAGACAGA | AAAGAATTCGGGGCGTTGGGCG         |
|                         | CCCGAATTCTCACGTAGCAGC                   | GAAGGATCCGCTCTGCTCTTGGGATTG    |
| <i>Cdkn2a</i><br>ΔAR3*  | TACTGT <u>GCTAGCG</u> AGTCCGCTGCAGACAGA | GCGTGTCTAGAAAGCCTTCCCGCGC      |
|                         | GCTCGTCTAGATGTGCGGATGCC                 | GAAGGATCCGCTCTGCTCTTGGGATTG    |
| <i>Cdkn2a</i><br>ΔAR4*  | TACTGT <u>GCTAGCG</u> AGTCCGCTGCAGACAGA | GCACCCCGCGGAACGCAAATATCGC      |
|                         | GTGTACCGCGGCCAACGTCGCC                  | GAAGGATCCGCTCTGCTCTTGGGATTG    |
| <i>Cdkn2a</i><br>ΔC21   | TACTGT <u>GCTAGCG</u> AGTCCGCTGCAGACAGA | GAAGGATCCCGTCTGGTCTGGG         |
| <i>CDKN2A</i><br>G139D* | GGCACCAGAGACAGTAACCATGC                 | ATGGGATCCTCAATCGGGGATGTCTGAGGG |
|                         | TACTGT <u>GCTAGCG</u> AGCCGGCGGGGAGC    | GCATGGTTACTGTCTCTGGTGCC        |
| <i>CDKN2A</i><br>S140C* | GCACCAGAGGCTGTAACCATGCC                 | ATGGGATCCTCAATCGGGGATGTCTGAGGG |
|                         | TACTGT <u>GCTAGCG</u> AGCCGGCGGGGAGC    | GGCATGGTTACAGCCTCTGGTGC        |
| <i>CDKN2A</i><br>H142R* | GGCAGTAACCGTGCCCGCATAG                  | ATGGGATCCTCAATCGGGGATGTCTGAGGG |
|                         | TACTGT <u>GCTAGCG</u> AGCCGGCGGGGAGC    | CTATGCGGGCACGGTTACTGCC         |
| <i>CDKN2A</i><br>A147G* | CGCATAGATGGCGCGGAAGG                    | ATGGGATCCTCAATCGGGGATGTCTGAGGG |
|                         | TACTGT <u>GCTAGCG</u> AGCCGGCGGGGAGC    | CCTCCGCGCCATCTATGCG            |

Restriction enzyme sites are underlined in the primer sequence. \* cloned using overlap-extension PCR.

**Suppl. Table 2: Primer employed in real-time PCR for evaluating expression levels in human cell lines.**

| Transcript ID             | Sequence (5' → 3')        |                             |
|---------------------------|---------------------------|-----------------------------|
|                           | Sense oligo               | Anti-sense oligo            |
| <i>MCM4</i>               | GACGAAGCCTATGACAGGCG      | TAGCATGGGCTTCTGCTAAGCG      |
| <i>DHFR</i>               | ACTGAACAACCAGAATTAGCA     | TCAGAGAGAACACCTGGGTAT       |
| <i>MYBB</i>               | CGGAGCCCCATCAAGAAAGT      | AGGTGTCGTGAAGTGGCTTC        |
| <i>TK1</i>                | AGACACTCGCTACAGCAGC       | CTCTGGAAGGTCCCATCCAGT       |
| <i>GRIM19 (native)</i>    | TGCCACTGTTACAGGCAGAAACC   | TGAAGCCGTGGCTGGCATGGAGAGC   |
| <i>GRIM19 (transgene)</i> | TGCCACTGTTACAGGCAGAAACC   | TTCTGAGATGAGTTTTTGTTCGGGCC* |
| <i>CDKN2A (transgene)</i> | GTCAGGGGCGCGCCTGGATGTGCGC | CCAGGTGAATATCAAATCCTCCTCG*  |

\* Expression vector-borne sequence present in the transcript.
